# Supplementary material for: Materials Based on Co, Cu, and Cr as Activators of PMS for Degrading a Representative Antibiotic—The Strategy for Utilization in Water Treatment and Warnings on Metal Leaching
Source: MDPI journal article supplement (doi:10.3390/molecules28114536), 2023-06-03
Supplement: s1 [file s1]

## SUPPLEMENTARY MATERIAL

# Materials Based on Co, Cu, and Cr as Activators of PMS for Degrading a Representative Antibiotic—The Strategy for Utilization in Water Treatment and Warnings on Metal Leaching

Efraím A. Serna-Galvis <sup>1,2,\*</sup>, Carlos Mendoza-Merlano <sup>2</sup>, Ricardo A. Torres-Palma <sup>1</sup>, Adriana Echavarría-Isaza <sup>2</sup> and Dora A. Hoyos-Ayala <sup>3,\*</sup>

<sup>1</sup> Grupo de Investigación en Remediación Ambiental y Biocatálisis (GIRAB), Instituto de Química, Facultad de Ciencias Exactas y Naturales, Universidad de Antioquia UdeA, Medellín 050010, Colombia; ricardo.torres@udea.edu.co

<sup>2</sup> Grupo de Catalizadores y Adsorbentes (CATALAD), Instituto de Química, Facultad de Ciencias Exactas y Naturales, Universidad de Antioquia UdeA, Medellín 050010, Colombia; cjavier.mendoza@udea.edu.co (C.M.-M.); adriana.echavarria@udea.edu.co (A.E.-I.)

<sup>3</sup> Grupo de Ingeniería y Gestión Ambiental (GIGA), Facultad de Ingeniería, Universidad de Antioquia UdeA, Medellín 050010, Colombia

\* Correspondence: efrain.serna@udea.edu.co (E.A.S.-G.); dora.hoyos@udea.edu.co (D.A.H.-A.)

**Table S1.** Leaching of cobalt from  $\Phi y$  after each reuse cycle.

| Cycle | Leached Cobalt        |
|-------|-----------------------|
|       | (mg L <sup>-1</sup> ) |
| 1     | 1.6                   |
| 2     | 1.3                   |
| 3     | 1.1                   |

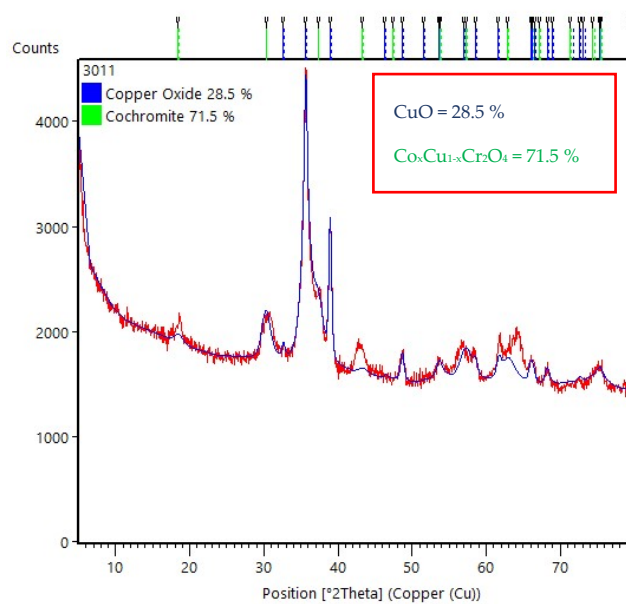

**Figure S1.** XRD Rietveld refinement for MMO.

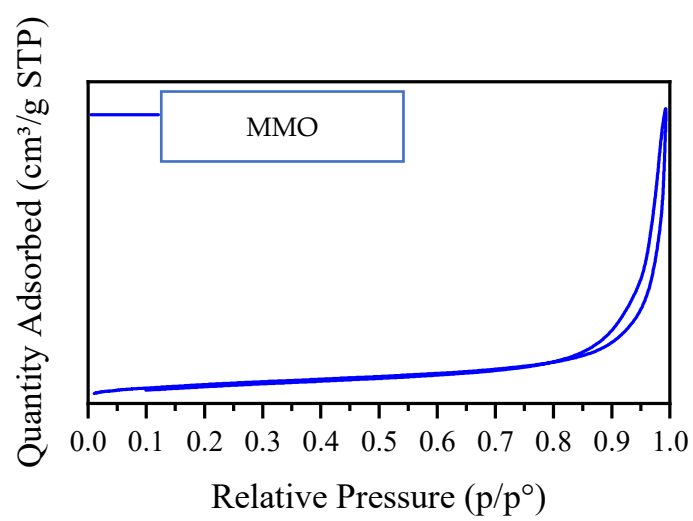

(a)

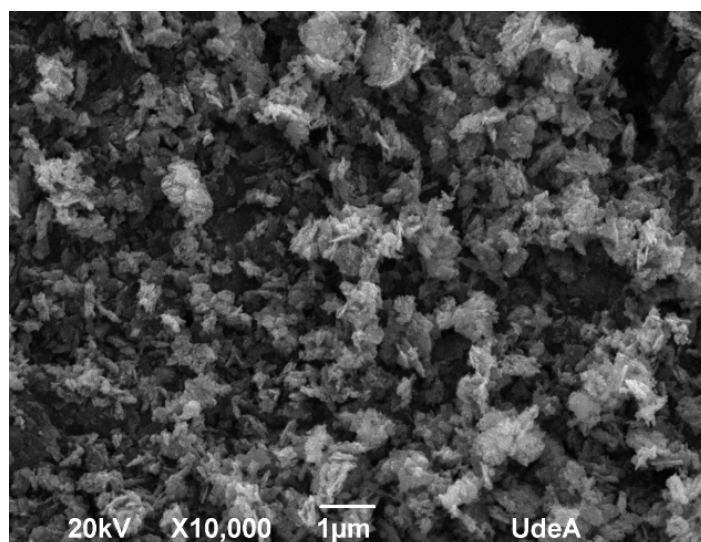

(b)

**Figure S2.** (a) The N<sub>2</sub>-adsorption isotherm for MMO. (b) SEM for MMO.

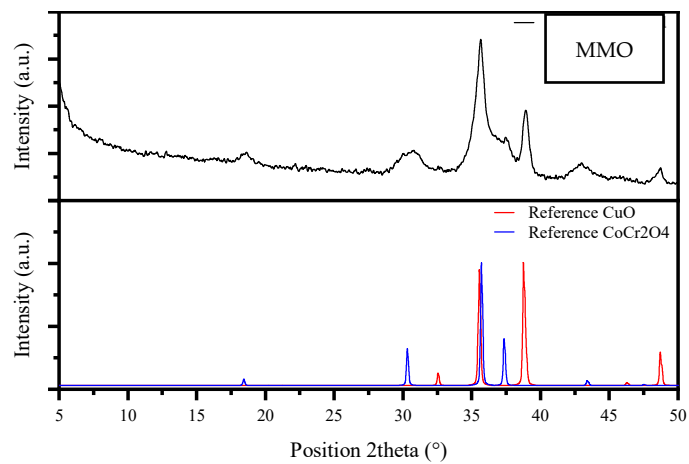

(a)

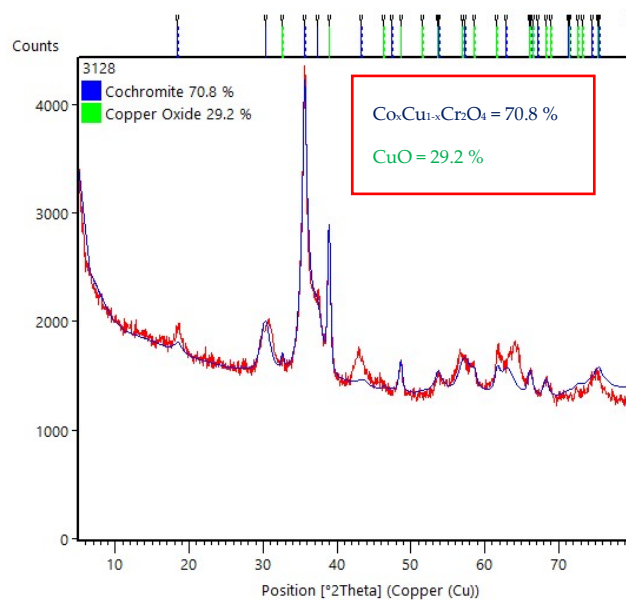

(b)

**Figure S3.** XRD analyses for MMO after its use in the MMO/PMS system. (a) XRD pattern and (b) Rietveld refinement.

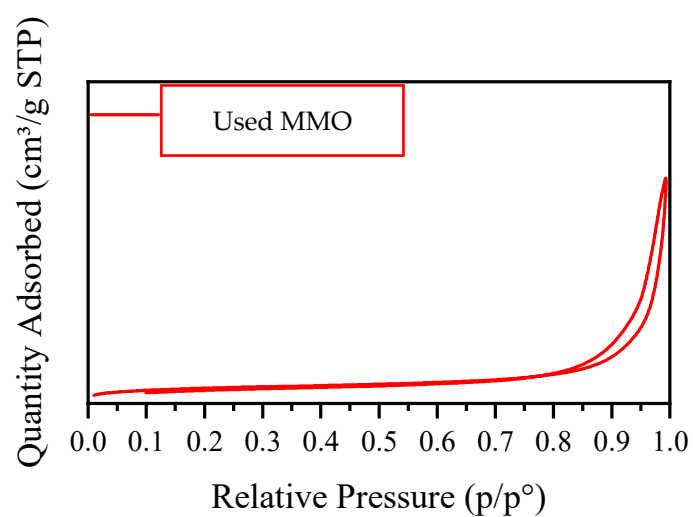

**Figure S4.** The N<sub>2</sub>-adsorption isotherm for used MMO.

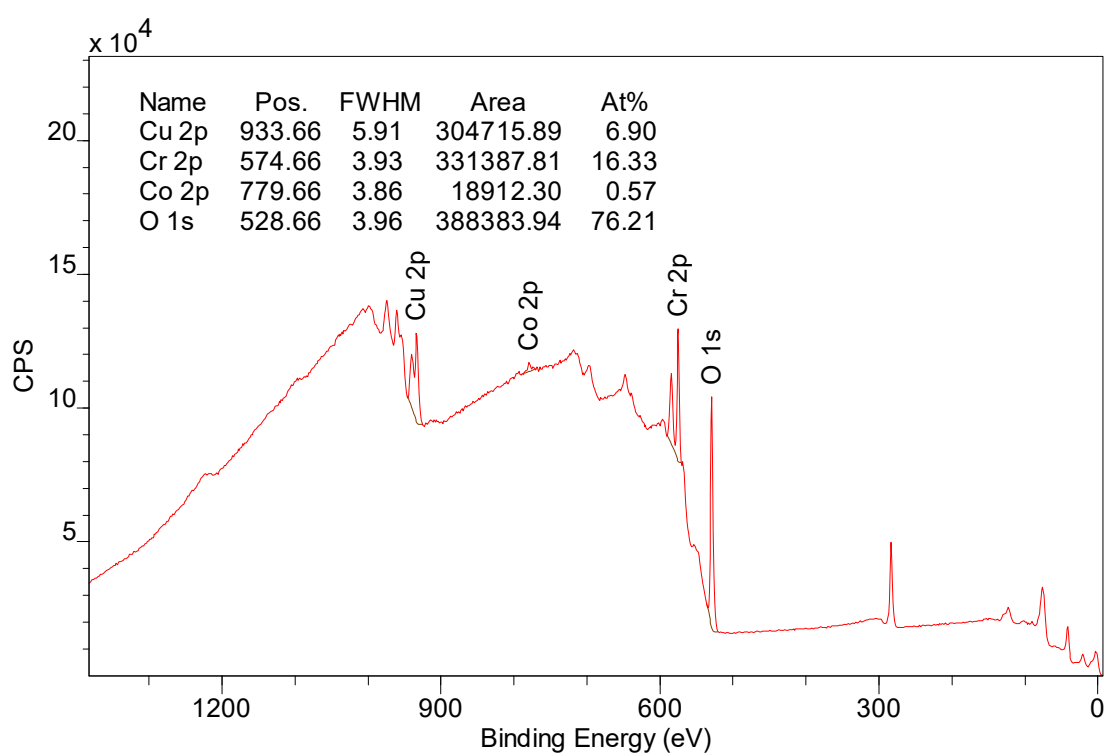

**Figure S5.** XPS for MMO after its use in the MMO/PMS system.

**Table S2.** Comparison of textural properties of MMO before and after use in the MMO/PMS system.

| Material       | $V_{\text{micro.}} (\text{cm}^3 \text{g}^{-1})$ | $V_{\text{total}} (\text{cm}^3 \text{g}^{-1})$ | $S_{\text{BET}} (\text{m}^2 \text{g}^{-1})$ | $S_{\text{ext.}} (\text{m}^2 \text{g}^{-1})$ |
|----------------|-------------------------------------------------|------------------------------------------------|---------------------------------------------|----------------------------------------------|
| MMO before use | 0.00                                            | 0.230                                          | 36.8                                        | 36.8                                         |
| MMO after use  | 0.00                                            | 0.176                                          | 29.2                                        | 29.2                                         |

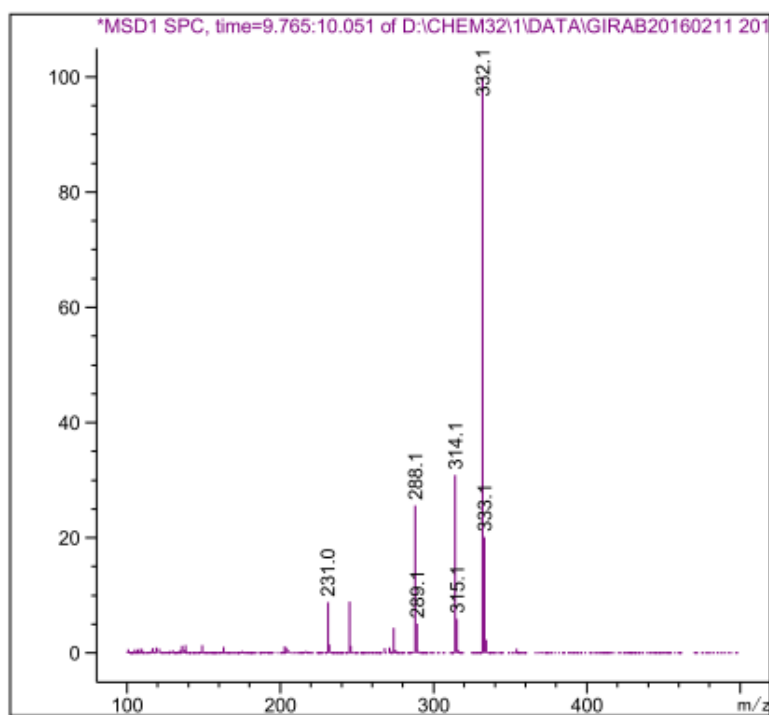

**Figure S6.** MS spectrum of CIP.

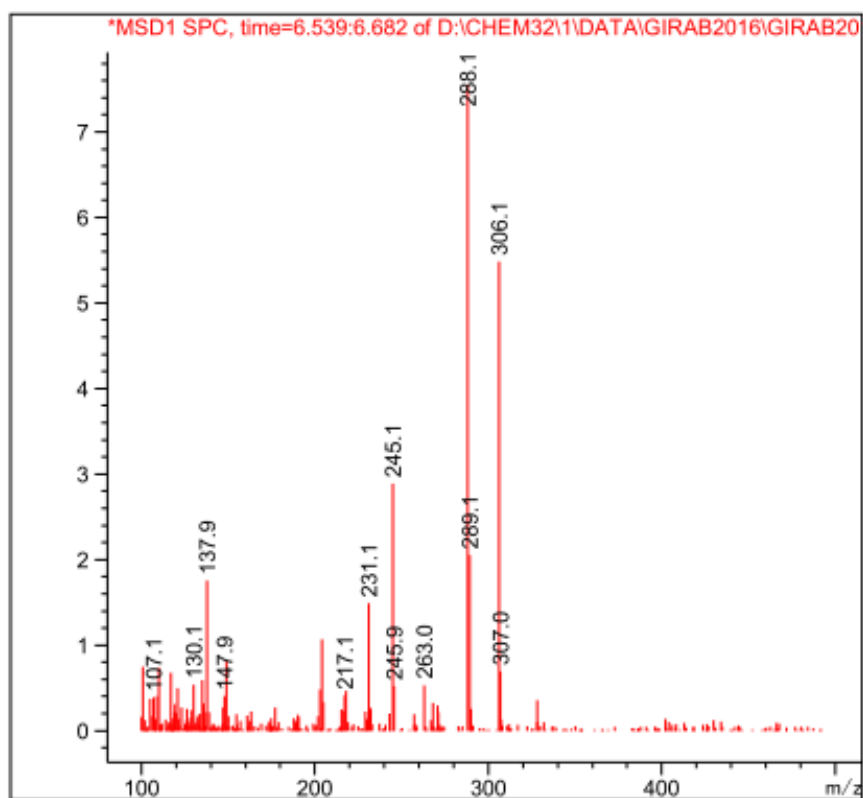

Figure S7. MS spectrum of P1.

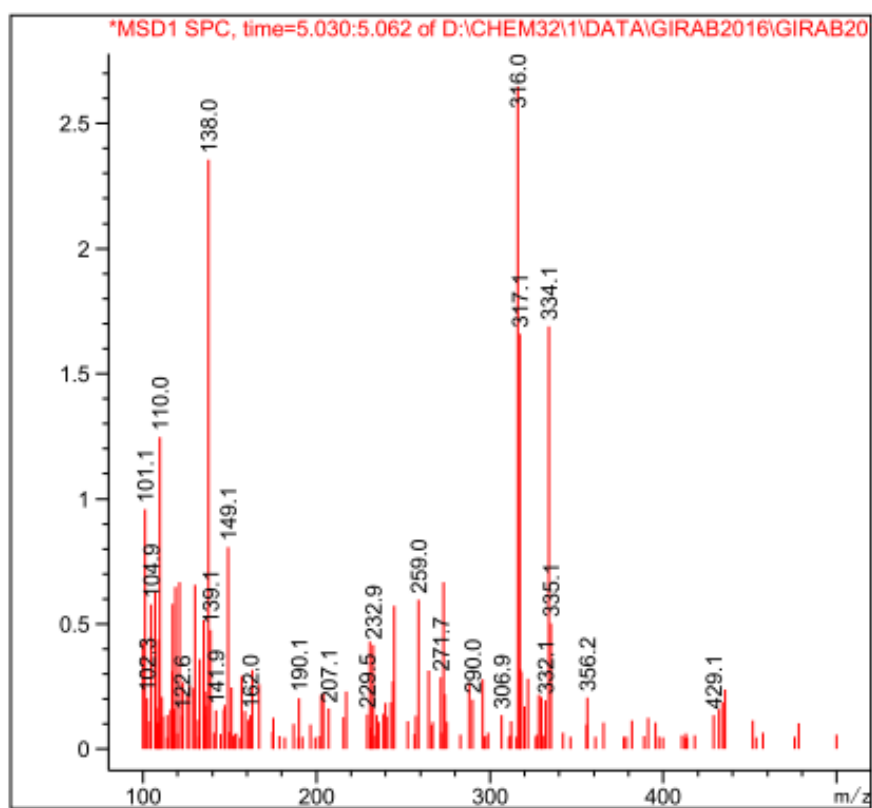

Figure S8. MS spectrum of P2.

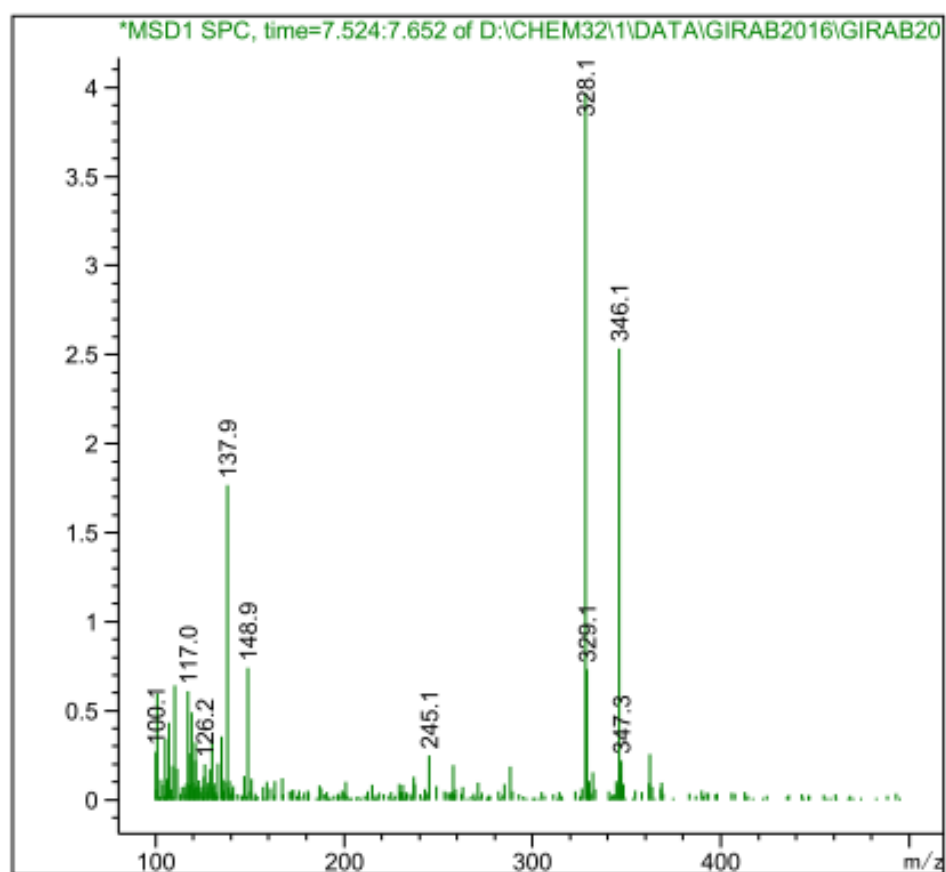

Figure S9. MS spectrum of P3.

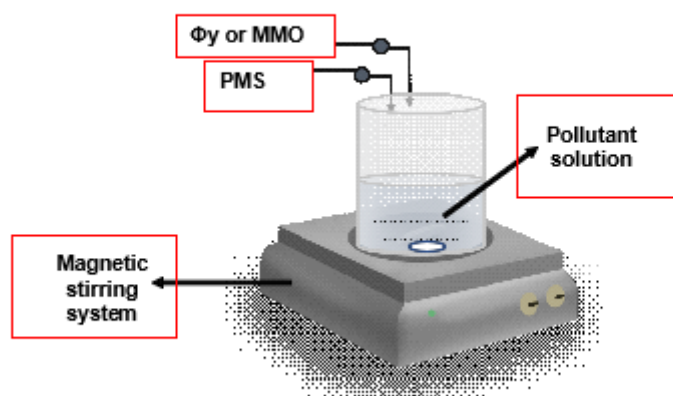

**Figure S10.** Reaction system for tests of pollutants degradation.

**Table S3.** CIP and its primary transformation products in SMILES format.

| Substance | SMILES                                                       |
|-----------|--------------------------------------------------------------|
| CIP       | <chem>O=C(O)C1=CN(c2cc(c(F)cc2C1=O)N1CCNCC1)C1CC1</chem>     |
| P1        | <chem>O=C(O)C1=CN(c2cc(NCCN)c(F)cc2C1=O)C1CC1</chem>         |
| P2        | <chem>O=CN(CCN)c1cc2c(cc1F)C(=O)C(=CN2C1CC1)C(=O)O</chem>    |
| P3        | <chem>O=C(O)C=1C(=O)c2cc(O)c(cc2N(C=1O)C1CC1)N1CCNCC1</chem> |
